# Supplementary material for: Evaluating the Utility of a Psychoeducational Serious Game (SPARX) in Protecting Inuit Youth From Depression: Pilot Randomized Controlled Trial
Source: PubMed Central journal article supplement (PMC10037175; doi:10.2196/38493), 2023-03-09
Supplement: games_v11i1e38493_app1.pdf [file games_v11i1e38493_app1.pdf]

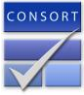

## CONSORT 2010 checklist of information to include when reporting a pilot or feasibility randomized trial in a journal or conference abstract

| Item               | Description                                                                                                 | Reported on line number           |
|--------------------|-------------------------------------------------------------------------------------------------------------|-----------------------------------|
| Title              | Identification of study as randomised pilot or feasibility trial                                            | 3                                 |
| Authors *          | Contact details for the corresponding author                                                                |                                   |
| Trial design       | Description of pilot trial design (eg, parallel, cluster)                                                   | 153                               |
| Methods            |                                                                                                             |                                   |
| Participants       | Eligibility criteria for participants and the settings where the pilot trial was conducted                  | 110                               |
| Interventions      | Interventions intended for each group                                                                       | 161                               |
| Objective          | Specific objectives of the pilot trial                                                                      | 67, 84, 100                       |
| Outcome            | Prespecified assessment or measurement to address the pilot trial objectives**                              | 206, 215, 222, 233                |
| Randomization      | How participants were allocated to interventions                                                            | 161                               |
| Blinding (masking) | Whether or not participants, care givers, and those assessing the outcomes were blinded to group assignment | N/A                               |
| Results            |                                                                                                             |                                   |
| Numbers randomized | Number of participants screened and randomised to each group for the pilot trial objectives**               | 289                               |
| Recruitment        | Trial status†                                                                                               |                                   |
| Numbers analysed   | Number of participants analysed in each group for the pilot objectives**                                    | 289                               |
| Outcome            | Results for the pilot objectives, including any expressions of uncertainty**                                | 289, 322                          |
| Harms              | Important adverse events or side effects                                                                    | N/A                               |
| Conclusions        | General interpretation of the results of pilot trial and their implications for the future definitive trial | 461                               |
| Trial registration | Registration number for pilot trial and name of trial register                                              | NCT05702086<br>clinicaltrials.gov |
| Funding            | Source of funding for pilot trial                                                                           | 91                                |

Citation: Eldridge SM, Chan CL, Campbell MJ, Bond CM, Hopewell S, Thabane L, et al. CONSORT 2010 statement: extension to randomised pilot and feasibility trials. *BMJ*. 2016;355.

*\*this item is specific to conference abstracts*

*\*\*Space permitting, list all pilot trial objectives and give the results for each. Otherwise, report those that are a priori agreed as the most important to the decision to proceed with the future definitive RCT.*

*†For conference abstracts.*
